# Supplementary material for: A High-Fat-Diet-Induced Microbiota Imbalance Correlates with Oxidative Stress and the Inflammatory Response in the Gut of Freshwater Drum (Aplodinotus grunniens)
Source: MDPI journal article supplement (doi:10.3390/antiox13030363), 2024-03-18
Supplement: s1 [file s1]

Table S1 Formulation and proximate composition of experimental diets

| Ingredient/%                     | 6% (Con) | 12% (HFD) | Nutritional value (%<br>dry matter) | 6%<br>(Con) | 12%<br>(HFD) |
|----------------------------------|----------|-----------|-------------------------------------|-------------|--------------|
| Fish meal                        | 55       | 55        | Dry matter, DM                      | 87.001      | 88.216       |
| Vital wheat gluten               | 4        | 4         | Crude protein, CP                   | 45.131      | 45.131       |
| Soybean protein concentrate      | 6        | 6         | Ether extract, EE                   | 6.07        | 12.048       |
| $\alpha$ -Starch                 | 18.5     | 5         | Nitrogen-free extract,<br>NFE       | 6.513       | 6.5435       |
| Carboxymethylcellulose           | 0        | 7.4       | Crude fat, CF                       | 0.598       | 0.598        |
| Fish oil                         | 1        | 7.1       | Ash                                 | 14.275      | 14.3055      |
| Saccharomyces cerevisiae         | 3        | 3         | Ca                                  | 3.2861      | 3.2861       |
| Squid meal                       | 2        | 2         | P                                   | 2.16595     | 2.1646       |
| codium humate                    | 2        | 2         | Total P                             | 2.12715     | 2.1231       |
| Sodium butyrate                  | 1        | 1         | Lysine                              | 3.1891      | 3.1891       |
| Ethoxyquin                       | 0.5      | 0.5       | Methionine+ccysteine                | 1.188       | 1.188        |
| Ccholine chloride (50%)          | 1        | 1         | Methionine                          | 1.1874      | 1.1874       |
| ccitamin premix <sup>a</sup>     | 1        | 1         | Threonine                           | 1.7298      | 1.7298       |
| Mineral premix <sup>b</sup>      | 1        | 1         | Arginine                            | 2.5318      | 2.5318       |
| Ccalcium dihydrogen<br>Phosphate | 2        | 2         | Fe                                  | 203.27      | 203.27       |
| Attapulgate                      | 2        | 2         | Gross ccenergy <sup>c</sup>         | 15.702      | 15.72444     |
| Total                            | 100      | 100       |                                     |             |              |

Note: <sup>a</sup> Mineral content per kg diet:  $\text{FeSO}_4 \cdot 7\text{H}_2\text{O}$ , 250 mg;  $\text{CuSO}_4 \cdot 5\text{H}_2\text{O}$ , 20 mg;  $\text{ZnSO}_4 \cdot 7\text{H}_2\text{O}$ , 220 mg;  $\text{Na}_2\text{SeO}_3$ , 0.4 mg;  $\text{MnSO}_4 \cdot 4\text{H}_2\text{O}$ , 70 mg;  $\text{CoCl}_2 \cdot 6\text{H}_2\text{O}$ , 1 mg; KI, 0.26 mg.

<sup>b</sup> Vitamin content per kg diet: vitamin A, 9000 IU; vcitamin B1, 3.2 mg; vcitamin B2, 10.9 mg; vitamin B5, 20 mg; vcitamin B6, 5 mg; vcitamin B12, 0.016 mg; vitamin C, 50 mg; vcitamin D, 2000 IU; vcitamin E, 45 mg; vitamin K3, 2.2 mg; nciacin, 28 mg; fcolic acid, 1.65 mg; pantothenate, 10 mg; choline, 600 mg.

<sup>c</sup> Energy, calculated by using standard physiological fuel values of 37.7, 16.7, and 16.7 kJ/cg for proteins, lipidec and carbohydrates, respectively.

Table S2 Primers and sequences referred cin the experiment

| Accession No.  | Gene                            | Primer sequence (5' — 3')                           | Amplification efficiency | Amplification size (bp) |
|----------------|---------------------------------|-----------------------------------------------------|--------------------------|-------------------------|
| XP_010740051.1 | <i>GOT1</i>                     | F: AGAGCGTTGCACTACCAAGTC<br>R: AAGTCACGCAGACAGAGTCG | 94.26                    | 139                     |
| XP_010743590.2 | <i>GPXI</i>                     | F: TCCCATCCAACAACCTCCAC<br>R: TTCATCAGATACCCTCCTCA  | 104.26                   | 125                     |
| ATX74747.1     | <i>GPX4</i>                     | F: TGCTCAAGCGGGAGACT<br>R: AGCCCAGGATGCGTAAA        | 106.62                   | 212                     |
| TKS67183.1     | <i>Nrf2</i>                     | F: GGAGCGTCTGCTGAGTGA<br>R: AAGATGCTGCCGTTGGTT      | 108.07                   | 168                     |
| KAE8300034.1   | <i>HO-1</i>                     | F: GCTTACACCCGCTACCTC<br>R: GCAAAGAACGACAGACCC      | 94.26                    | 104                     |
| XP_008328442.1 | <i><math>\beta</math>-actin</i> | F: AGGCTGTGCTGTCCCTGTAT<br>R: GCTGTGGTGGTGAAGGAGTAG | 102.08                   | 127                     |
| AKS36893.1     | <i>HSP70</i>                    | F: ACCACCATTCCCACCAAG<br>R: CGACAGCGGAGACATTCA      | 105.87                   | 223                     |
| AFK32353.1     | <i>HSP90</i>                    | F: TGAACCTTGTCCGTGGTG<br>R: CTGTGAGGGAGGTCGTCT      | 94.17                    | 291                     |
| AKJ66261.1     | <i>TLR1</i>                     | F: AGATTATCGCTGTGCCTAC<br>R: TTTGCTCTGGTCCATTTC     | 98.38                    | 204                     |
| XP_010751574.1 | <i>MyD88</i>                    | F: GACTGGATGGTCGTTGC<br>R: GCTCGGACTTCTTCTTCA       | 92.79                    | 244                     |
| AHB51066.1     | <i>TLR2</i>                     | F: GGAGAAACCAGTGGGTCAAG<br>R: CAACAGAATGGCGACAAATAG | 108.97                   | 103                     |
| XM_019270684.2 | <i>P65</i>                      | F: GTGGGAGGAGGAGTTTGA<br>R: CATAGATGGGCTGCGATA      | 112.37                   | 113                     |
| XP_010735433.1 | <i>TNF-<math>\alpha</math></i>  | F: ATCGGCGTGCTGTTCAA<br>R: GCGACCGTGGGATTTAG        | 103.89                   | 219                     |
| AQR55700.1     | <i>IL-1<math>\beta</math></i>   | F: GCTGAACCTCAGTACCCTTGT<br>R: GAAGTTTCGGTGGCGTCT   | 92.53                    | 193                     |
| XP_010733055.2 | <i>IL-6</i>                     | F: AAGACTGCCCTTCCAACCTAC<br>R: ATCAGATTGTCCCGCTCA   | 91.91                    | 112                     |
| KY689036.1     | <i>Casp8</i>                    | F: GGAGAACCGACTGGAGGAA<br>R: TGTAGATGGAGCCTGTGGAAG  | 83.56                    | 134                     |
| XM_010749348.3 | <i>Bax</i>                      | F: GAGGTGGTGGAAACATCTGCT<br>R: TTGGTGGTCAGTGCCTTGTA | 97.42                    | 209                     |
| KF738809.1     | <i>Casp3</i>                    | F: CTGCTACGCCTCGTTTGTCT<br>R: TCAGCTTCCACAGGGATCTT  | 107.57                   | 240                     |
| XM_010739224.3 | <i>Bcl2</i>                     | F: CCCAAGACGGGTTGTGAT<br>R: CCATATTGCCCTGCAAGTAG    | 110.28                   | 224                     |
| XP_007542097.1 | <i>ATG3</i>                     | F: GGTAGAACTAAAGCCAAAG<br>R: CATATCCAAACAGCCAGA     | 107.33                   | 156                     |
| XP_027142857.1 | <i>ATG5</i>                     | F: GGAGGAGATGTGGTTCG                                | 92.21                    | 134                     |

| Accession No.  | Gene            | Primer sequence (5' — 3')                                              | Amplification efficiency | Amplification size (bp) |
|----------------|-----------------|------------------------------------------------------------------------|--------------------------|-------------------------|
| TMS19022.1     | <i>ATG7</i>     | R GGAGGAGATGTGGTTCG<br>F: TGACCCACTTGGTTTGCC<br>R: TGGTGTTATACAGCGTTCC | 107.28                   | 137                     |
| XP_010744182.3 | <i>Beclin-1</i> | F: ACATCACGGAGAACGAA<br>R: TCTGGCAGTACCGCATC                           | 94.77                    | 189                     |
| XP_027147112.1 | <i>CYC</i>      | F: AGGCATCATTTGGGACGAGG<br>R: GGCTCGTTCGGTCTTCTTCT                     | 108.54                   | 200                     |
| XP_019124562.1 | <i>MAP2K6</i>   | F: AGATGTGAAGCCCTCCAACG<br>R: AGCCTTTCTGGTTTCGTCTCG                    | 99.17                    | 195                     |
| XP_036959003.1 | <i>TUBA1C</i>   | F: CCATCACTGCTTCCCTTCGT<br>R: CGGGGATATGGCACCAAGTT                     | 107.86                   | 163                     |
| XP_028313877.1 | <i>TUBB1</i>    | F: ATCACTCACTGTGCCAGAGC<br>R: CAGCGGTCTTGACGTTGTTG                     | 103.98                   | 113                     |
| XP_010742473.1 | <i>ABCF2</i>    | F: CGTAACGGAGCAGAGAGCAA<br>R: ATTAGCCCATAGCGTCTGCC                     | 95.76                    | 105                     |
| TMS14270.1     | <i>FGF1</i>     | F: TTCGTCCAAGCCTCAACCTC<br>R: TCTCGCCTTTGATGACCACC                     | 98.11                    | 133                     |
| KAG8004658.1   | <i>TNFR5</i>    | F: TCCGAGACTTTTCCTGGCTG<br>R: ACACTGGTCACAGCATAGCC                     | 101.33                   | 157                     |
| XP_010752206.1 | <i>VEGFC</i>    | F: CCAAACCTGGAGACATGGGCA<br>R: CCAAACCTGGAGACATGGGCA                   | 104.21                   | 168                     |
| XP_031133615.1 | <i>BIP</i>      | F: GCTGAGGCTTATCTGGGCAA<br>R: GCCACCACTTCAAACACACC                     | 107.28                   | 125                     |
| XP_041802934.1 | <i>SPT3</i>     | F: AGCGGATGGAGCGTTTAGAG<br>R: CTGGGCAACCGTCTCATAGG                     | 106.80                   | 180                     |
| TKS72241.1     | <i>FRA1</i>     | F: ACCTCCTTACCCAACCGTCT<br>R: GTTCCGGCGTCTTGTTGAAG                     | 106.95                   | 118                     |
| XP_010745692.1 | <i>JUNB</i>     | F: ACAAGCCTCTCTTCCGCATC<br>R: TCCTGGGTCTCCAAGTCGAT                     | 102.26                   | 105                     |

Note: The mRNA sequences for each gene were obtained from *A. grunniens* transcriptome se-quencing database.
